# Supplementary material for: Polyvinyl Chloride Promotes Radioresistance in Hepatocellular Carcinoma by Inhibiting Radiotherapy-Induced CD8⁺ T Cell Differentiation
Source: Research Square preprint supplement (doi:10.21203/rs.3.rs-7719052/v1), 2025-10-03
Supplement: Supplementary file 1 [file eee94e121715af0df3ccbd87.docx]

**Supplementary methods**

***Quantitative and qualitative of MPs in HCC***

HCC specimens were obtained through percutaneous biopsy, then promptly transferred into pre-conditioned glass vials. The tissues were preserved at –80 °C. All procedures were performed within a laminar flow bench. To minimize the potential for secondary contamination, operators wore cotton-based laboratory coats and non-plastic gloves throughout sample handling. Prior to use, all glassware and metal instruments were thoroughly rinsed three times with deionized water that had been passed through a 1.6 μm pore-size glass fiber membrane filter (Whatman GF/A, UK). HCC samples were weighed and subjected to digestion in a 10% potassium hydroxide (KOH) solution—prepared from analytical-grade KOH pellets and similarly filtered—at a solution-to-tissue volume ratio of 40:1. The digestion process was conducted in sealed glass vessels at 25 °C for 14 days. The digested solutions were passed through 1.6 μm pore-size glass fiber filters. Subsequently, the membranes were gently rinsed with deionized water and left to dry at 25 °C. A parallel blank control group was processed using identical procedures to monitor potential background contamination by MPs introduced during sample handling.

***Establishment of an orthotopic HCC model***

Female C57BL/6 mice aged 6 to 8 weeks were sourced from the Experimental Animal Center of Zhejiang Provincial People's Hospital. 1 × 10^6 Hepa1-6-luc cells were injected beneath the liver capsule. Likewise, the Hep53.4-luc orthotopic tumor model was established by administering 1 × 10^6 Hep53.4-luc cells in the same manner. Tumor development was tracked via bioluminescence imaging performed in vivo.

***Mouse treatments***

On day 5 post tumor implantation, mice were ear-tagged and randomly allocated to different treatment arms. Experimental groups received either radiotherapy or daily oral administration of 1 μm MPs, including PVC (ZKKY-PVC-0100, Zhongke Keyou Company), PE-labeled PVC (ZKKY-PVC-1-01, Zhongke Keyou Company), PS (6-1-0060, BaseLine ChromTech), FITC-labeled PS (7-3-0100, BaseLine ChromTech), PE (W532194, BaseLine ChromTech), or FITC-labeled PE (ZKKY-PE-1-01, Zhongke Keyou Company) at a dose of 20 μg/mouse/day. In both the Hepa1-6 and Hep53.4 models, a total radiation dose was delivered in three fractions of 6 Gy each on days 1, 3, and 5. Tumor progression was monitored at five-day intervals. Irradiation was carried out using an X-ray linear accelerator (LINAC). To deplete CD8+ T cells, mice received intraperitoneal injections of 200 µg anti-CD8 antibodies (clone 2.43, Bio X Cell), starting three days prior to RT and continuing twice weekly thereafter. On day 5 after tumor establishment, mice received daily intraperitoneal injections of 2-DG at a dose of 20 mg/mouse. For high-cholesterol dietary intervention, mice were switched from the first day of treatment to a low-fat (4% fat) and high-cholesterol (1% cholesterol, w/w) diet to simulate cholesterol metabolism modulation.

***Bioluminescence imaging***

Hepa1-6 and Hep53.4 cells were stably engineered to express firefly luciferase, and orthotopic tumor models were generated as previously described. For bioluminescence imaging, mice were administered D-Luciferin potassium salt (150 mg/kg; Beyotime) via intraperitoneal injection 15 minutes before imaging using the Spectral Instruments imaging platform.

***Cell proliferation and radiosensitivity Assays***

Hepa1-6 and Hepa53.4 cells in the logarithmic growth phase were seeded into 96-well plates and co-cultured with 1 μm PVC (0.1, 1, 10, and 100 μg/mL) for 7 days. 190 μL of serum-free medium and 10 μL of CCK-8 were added and incubated for 2 hours. The absorbance was measured at 490 nm. To evaluate radiosensitivity, Hepa1-6 and Hepa53.4 cells were treated with PVC for 7 days. After irradiation, cells were fixed with 4% paraformaldehyde and stained with 0.1% crystal violet (MedChemExpress). Colonies containing more than 50 cells were identified.

***Mass cytometry***

On day 15, orthotopic Hepa1-6 tumors were excised and transferred into cryovials containing tissue preservation buffer for subsequent single-cell suspension preparation. Purified antibodies were sourced from BioLegend, eBioscience, BioXcell, R&D Systems, and Bio-Rad. Antibodies were conjugated with metal isotopes using the MaxPAR Antibody Labeling Kit (Fluidigm). Prior to use, metal-conjugated antibodies were titrated to determine the optimal staining concentration. List of antibodies is provided in Supplementary Table 2. Cells were washed once with 1× PBS and then incubated on ice for 5 minutes with 100 μL of 250 nM cisplatin (Fluidigm) to exclude dead cells. Afterward, cells were incubated in Fc receptor blocking solution, followed by staining with a cocktail of surface antibodies on ice for 30 minutes. Cells were then washed with FACS buffer (1× PBS + 0.5% BSA) and fixed overnight in 200 μL of Maxpar Fix and Perm Buffer (Fluidigm), which contained 250 nM 191/193Ir intercalator. After fixation, cells were washed with FACS buffer and permeabilization buffer (eBioscience), then stained on ice for 30 minutes with a cocktail of intracellular antibodies. Cells were subsequently washed with deionized water, resuspended, and supplemented with 20% EQ Four Element Calibration Beads (Fluidigm). Data acquisition was performed using a Helios mass cytometer (Fluidigm). CyTOF analysis was conducted at the laboratory of Plttech Technology Company.

***Flow cytometric analyses***

Single-cell suspensions were prepared from harvested tumor tissues. Cells were incubated at 37 °C for 4 hours with Leukocyte Activation Cocktail containing GolgiPlug (550583, BD Biosciences), followed by 2-hour culture period to facilitate intracellular detection of IFN-γ. Antibodies (clones, catalog number) purchased from BioLegend: Brilliant Violet 510™ CD8a (53-6.7, 100752), FITC CD3 (17A2, 100204), PE CD3 (145-2C11, 561100), APC IFN-γ (XMG1.2, 505810), PerCP/Cyanine5.5 Brilliant Violet 421TM NK-1.1 (PK136, 108741), PerCP/Cyanine5.5 CD45 (30-F11, 103132), PE/Cy7 CD206 (C068C2, 141719), PE CD86 (GL-1, 105008), APC F4/80 (BM8, 123116), FITC CD11b (M1/70, 101206), APC CD62L (MEL-14, 104412), APC/Cyanine7 CD11c (N418,117323), Brilliant Violet 421™ CD80 ([16-10A1](https://www.biolegend.com/en-us/search-results?Clone=16-10A1),104725), APC CD83 ([Michel-19](https://www.biolegend.com/en-us/search-results?C),121509), Brilliant Violet 510™ MHCII ([M5/114.15.2](https://www.biolegend.com/en-us/search-results?Clone=M5/114.15.2),107635) , APC/Cy7 PD-1( 29F.1A12, 135224), PE Tim-3 (B8.2C12, 134004) , KIRAVIA Blue 520™ IFN-γ (4S.B3, 502553) , APC PD-1 (EH12.2H7, 329907) , FITC CD3 (OKT3, 317305) , PE CD8 (RPA-T8, 301007), APC/Cyanine7 Tim-3 (A18087E, 364811), APC/Cyanine7 CD62L (DREG-56, 980708), TCF-1 (7F11A10, 655203). Antibodies purchased from BD: Alexa Fluor 488 TCF-1 (S33-966, 567018). Supplementary Fig 1 illustrates a representative gating strategy employed for flow cytometry analysis.

***Immunofluorescence staining***

Tumor specimens were fixed in 4% paraformaldehyde, embedded in paraffin, and sectioned for immunohistochemical analysis. CD8⁺ T cells were identified using anti-CD8 antibody (EPR21769, Abcam) and anti-TCF-1 antibody (2203T, CST), followed by incubation with secondary antibodies. Nuclear counterstaining was performed using DAPI. CD8⁺ T cell was assessed in five randomly selected fields under a 10× magnification lens. Quantification was conducted using ImageJ software.

***Isolation and differentiation of bone marrow–derived macrophages*** ***and bone marrow–derived dendritic cells***

C57BL/6 mice were euthanized by cervical dislocation, and the femurs and tibias were harvested. Bone marrow was flushed from the marrow cavities using PBS and filtered through a 70 μm cell strainer. Bone Marrow–Derived Macrophages (BMDMs) were cultured for 7 days in RPMI-1640 medium supplemented with 10% FBS, 20 ng/mL M-CSF, and 1 μg/mL PVC. On day 7, cells were exposed to 6 Gy of irradiation. After 72 h, culture supernatants were collected for co-culture with CD8+ T cells. Bone marrow–derived dendritic cells (BMDCs) were cultured with 15 ng/mL GM-CSF, 10 ng/mL IL-4, and 1 μg/mL PVC for 7 days. On day 7, the cells were irradiated with 6 Gy and the culture supernatants were harvested after 72 h for CD8+ T cell co-culture.

***Isolation and culture of mouse CD8⁺ T Cells***

Single-cell suspensions were generated from spleens of C57BL/6 mice. Naïve CD8⁺ T cells were purified using the Mouse CD8⁺ T Cell Isolation Kit (Miltenyi Biotec). Cells were maintained in culture medium supplemented with 55 μM β-mercaptoethanol (β-ME; Sigma-Aldrich) and 5 ng/mL recombinant murine IL-2 (PeproTech). The medium was refreshed every 48 hours. On day 1, supernatants derived from pre-established BMDMs and BMDCs cultures were added.

***Isolation and culture of human CD8⁺ T Cells and primary HCC cells***

Naïve human CD8⁺ T cells were purified using the Human CD8⁺ T Cell Isolation Kit (HY-K0351, MCE). Cells were stimulated with anti-CD3/CD28 magnetic beads (Cat11161D, Thermo Fisher) and cultured in the presence of human IL-2 (PeproTech, Cat# 200-02) for 7 days. On day 1, supernatant from primary human HCC cell culture was added to the system.

HCC biopsy specimens were minced and digested with a collagenase VI solution at 37 °C for 30 minutes. The resulting cell suspension was filtered through sterile gauze and centrifuged twice at 1,000 rpm for 5 minutes, the supernatant was discarded. The pellet was then subjected to two additional centrifugation steps at 800 rpm for 4 minutes, with the supernatant discarded each time. The final cell pellet was resuspended in DMEM supplemented with 10% fetal bovine serum. Cells were seeded into 25 mL culture flasks at a density of 1×10⁶ cells/mL. After 24 hours, the medium was replaced to remove non-adherent cells. ToProCult™-Hepatoma Medium (TC200, Biotech) was then added. The medium was changed every 3 days. Fibroblasts were removed using repeated differential adhesion and mechanical scraping methods, resulting in the purification of primary HCC cells. The purified primary HCC cells were cultured in ToProCult™-Hepatoma Medium (TC200, Biotech) for 7 days, and the culture supernatant was collected on day 7. On day 1 of culture, primary HCC cells were exposed to 6 Gy irradiation using an X-ray linear accelerator (LINAC). Co-culture with PVC was performed at a concentration of 1 μg/mL. Cholesterol (HY-B0589, Sigma Aldrich) was applied at a concentration of 20 μM, and 2-DG was administered at a concentration of 20 mM.

***RNA-seq***

Hepa1-6 cells were divided into control and IR groups. After 7 days of culture post-irradiation, cells were collected for transcriptome sequencing analysis, which was performed by Beijing Biomics Technology Co., Ltd.

***PCR***

Hepa1-6 cells were divided into control and IR groups. After 7 days of culture post-irradiation, total RNA was isolated. cDNA synthesis was carried out using the PrimeScript Reverse Transcription Kit (Takara). Quantitative real-time PCR (qRT-PCR) analysis was performed with SYBR Premix Ex Taq™ (Takara) on a Roche LightCycler 480 system.

***Cholesterol Assay***

After 7 days of culture, the supernatants from control and IR groups of Hepa1-6 cells were collected. Cholesterol was measured using a mouse automated biochemical analyzer.

***Public Data Processing and Analysis***

ChIP-seq data (GSE156674) and RNA-seq data (GSE156675) were obtained from the GEO database. The Integrative Genomics Viewer (IGV) was used to analyze whether the promoter region of HMGCR is regulated by histone H3K18 lactylation. Additionally, the effects of 2-DG and oxamate on HMGCR mRNA levels were evaluated.

***Western blotting***

Hepa1-6 cells were lysed with RIPA protein extraction buffer. Protein concentrations were determined using the BCA assay. Proteins were separated by SDS-PAGE and transferred onto PVDF membranes. The membranes were blocked with 5% non-fat milk (Bio-Rad, USA) a for 1 hour, then washed with TBST and incubated overnight at 4°C with primary antibodies: anti-HMGCR (GB15003-100, Diagbio), anti-H3K18 lactylation (H3K18la; PTM-1406RM, Jinjie), and anti-β-actin (GB15003-100, Servicebio). After washing with TBST, membranes were incubated with corresponding secondary antibodies for 90 minutes. Immunoreactive bands were visualized using a gel imaging system and analyzed for relative band density with Fusion software.

***Chromatin immunoprecipitation sequencing***

Chromatin immunoprecipitation was performed by the Pierce™ Magnetic ChIP Kit (Thermo Fisher Scientific, #26157) following the manufacturer's instructions. HepG2 cells were cross-linked with formaldehyde and lysed to obtain soluble DNA–protein complexes. The chromatin was then sheared into fragments, and immunoprecipitation was carried out to enrich for target protein–DNA complexes. The precipitated complexes were subsequently washed and eluted. DNA was purified and used for library preparation. Sequencing was performed on the Illumina HiSeq 2500 platform.

***Molecular Dynamics (MD) Simulation of the PVC Model***

MD simulations were performed using GROMACS 2022.1 under constant temperature and pressure conditions with periodic boundary conditions. During the MD simulations, all bonds involving hydrogen atoms were constrained using the LINCS algorithm, with an integration time step of 2 fs. Electrostatic interactions were calculated using the Particle Mesh Ewald method. A cutoff distance of 10 Å was applied for non-bonded interactions, which were updated every 10 steps. Temperature was maintained at 298.15 K using the V-rescale thermostat, and pressure was controlled at 1 bar using the Parrinello-Rahman barostat. Initially, energy minimization of both systems was performed using the steepest descent method to eliminate any close atomic contacts. This was followed by 1 ns each of NVT and NPT equilibration simulations at 298.15 K. Finally, production MD simulations were run for 50 ns for both systems, with conformations saved every 10 ps. Visualization of the simulation results was conducted using built-in GROMACS tools and VMD. One hundred PVC polymer chains were arranged in a layered structure with dimensions of 1 × 4 × 25 along the X, Y, and Z axes, respectively. A 50 ns MD simulation was performed on the entire layered polymer system to promote the aggregation of the initially dispersed layers, resulting in a more stable layered PVC polymer structure. This enhanced stability is favorable for the binding of protein molecules on its surface. Conformations were extracted before and after the MD simulation. After 50 ns, the initially dispersed PVC chains aggregated to form a more compact and stable layered polymer. Solvent-accessible surface area analysis indicated that the entire layered composite system reached equilibrium around 10 ns.

***Molecular Docking Between the PVC Model and Cholesterol***

The molecular structure of cholesterol was obtained from the PubChem database and optimized using the MOPAC program. Partial atomic charges were calculated using the PM3 semi-empirical method. Ligand preparation was performed using AutoDock Tools 1.5.6. The docking grid box was centered on the PVC model, encompassing the entire polymer structure, with grid dimensions set to 100 × 100 × 100 points along the X, Y, and Z axes. The number of docking runs was set to 50, while all other parameters were kept at default values. Due to possible steric clashes and unfavorable atomic contacts in the initial docking poses, energy minimization was carried out to relieve strain and optimize the binding conformation. The Amber14 force field was used for this process. Energy minimization was performed in two steps: an initial 1,000 steps of the steepest descent method followed by 5,000 steps of the conjugate gradient method. The final optimized structure was used for subsequent analyses. The binding energy between cholesterol and the PVC model was predicted using AutoDock software.

***Intracellular Binding of PVC and Cholesterol***

Hepa1-6 cells (1 × 10⁵) were co-culture with 1 μg/mL FITC-labeled cholesterol (X-DC096305, New Weichuang Biotechnology Co., Ltd.) and 1 μg/mL PE-labeled PVC for 3 days. The co-localization of cholesterol and PVC within cells was observed in three randomly selected fields using a 10× objective lens. Image analysis was performed using ImageJ software.

**Supplementary Figures**

**
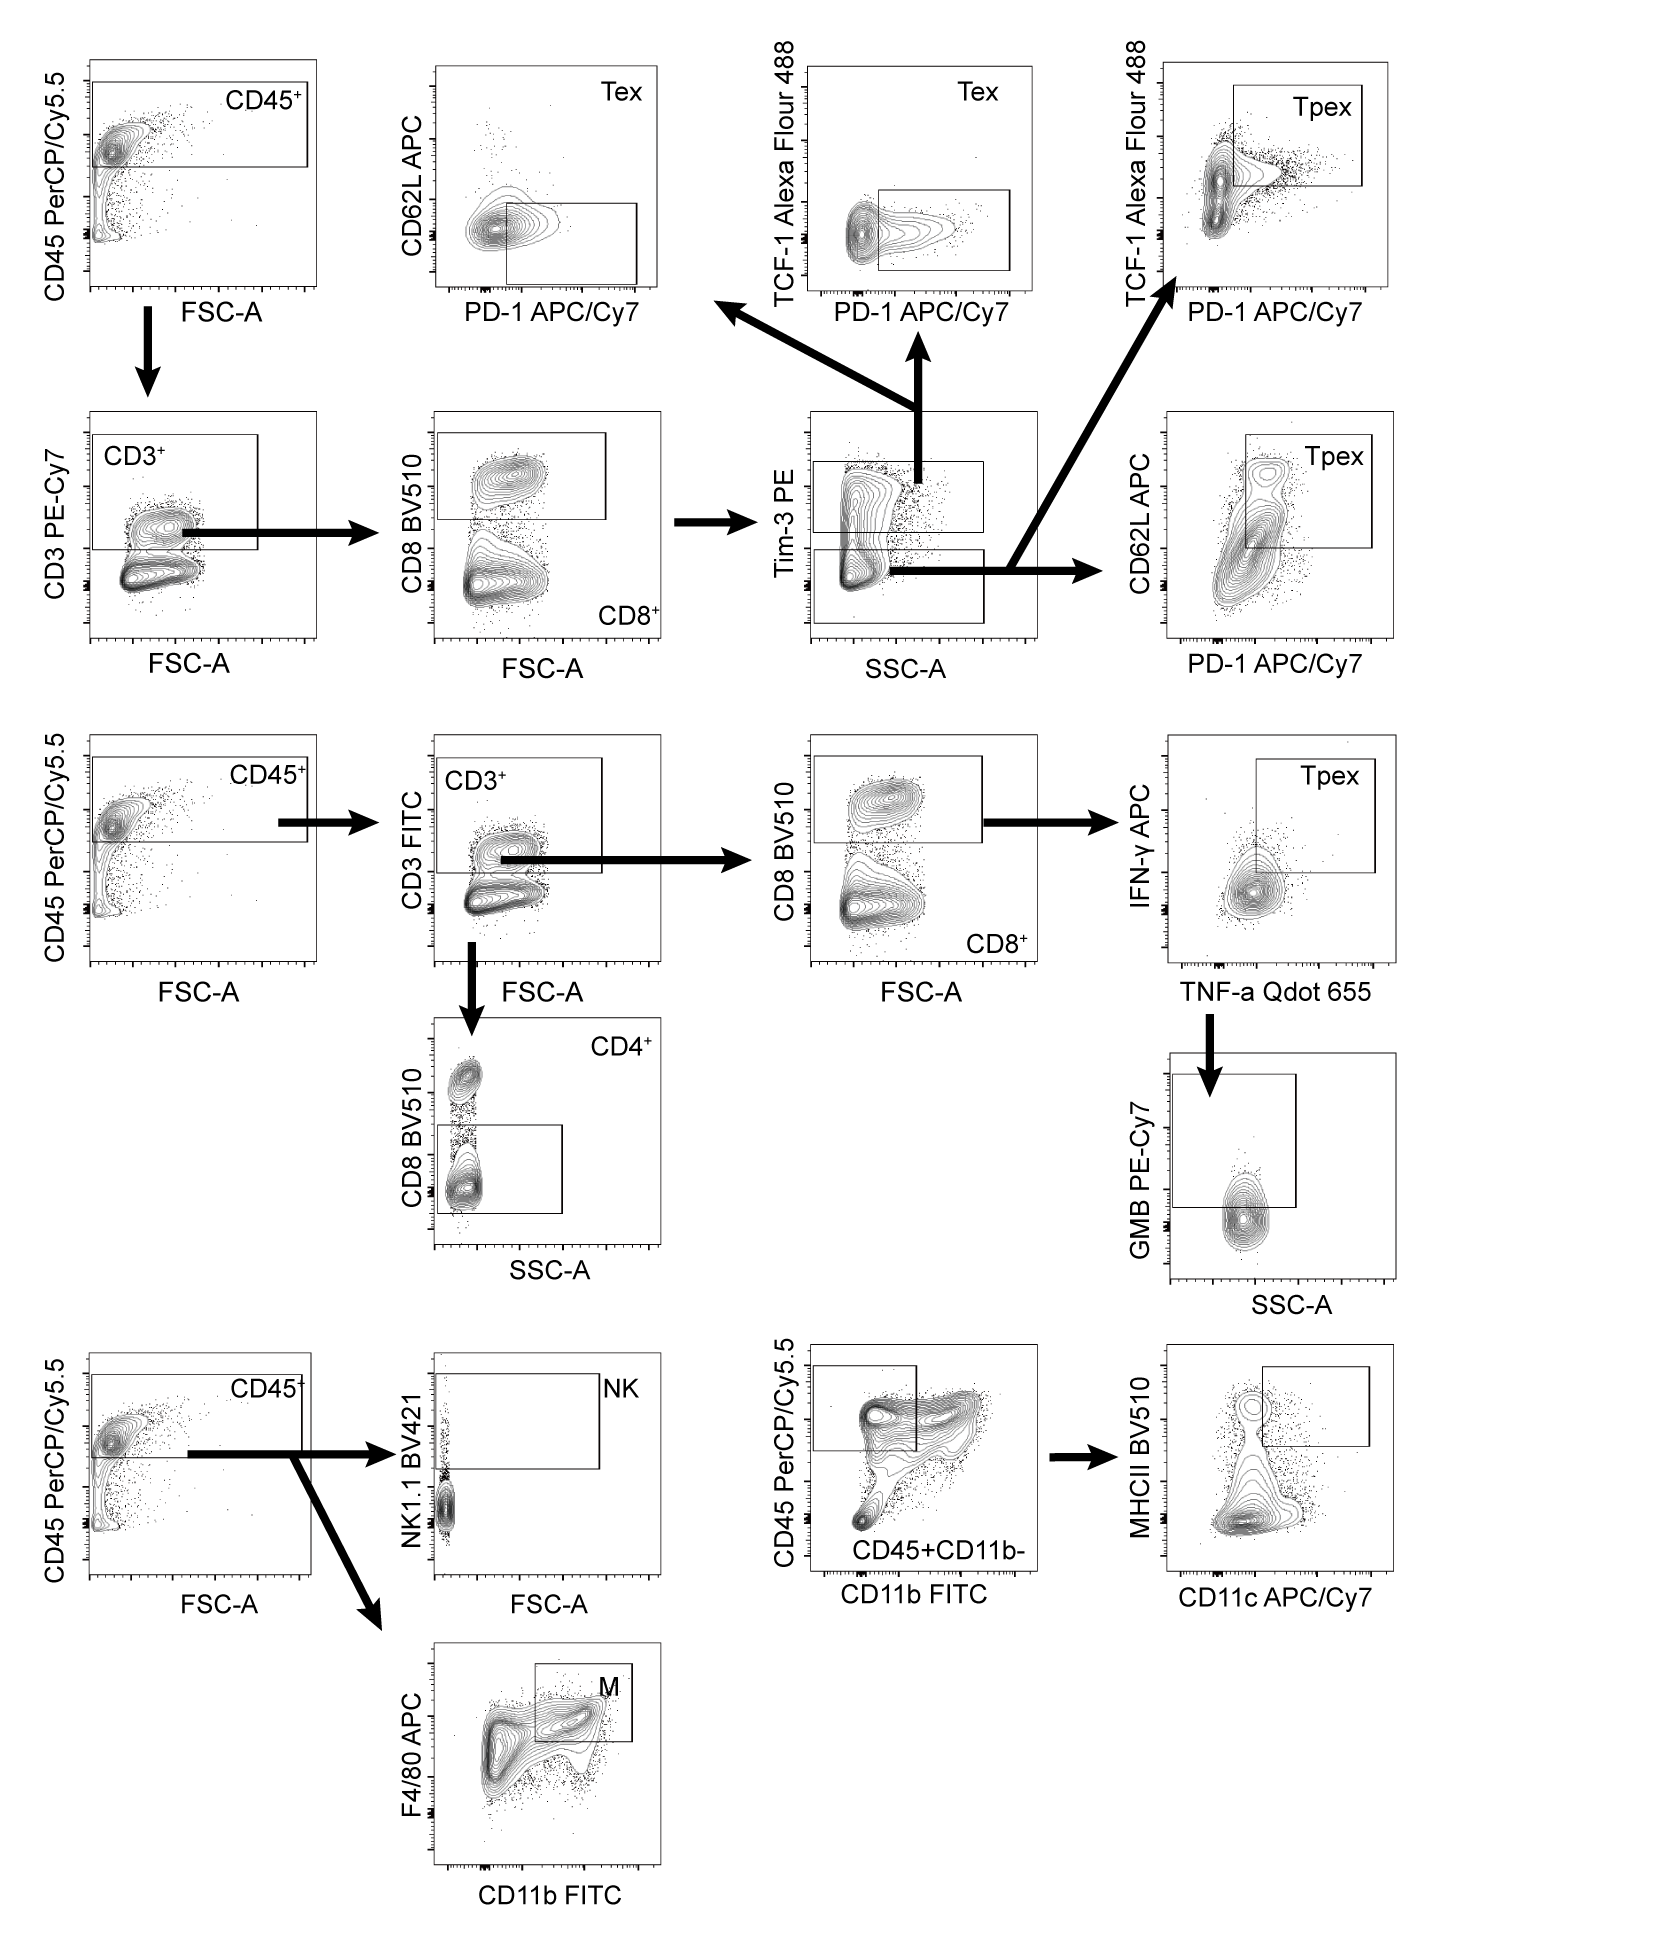
**

**Supplementary Fig 1. Gating strategy for immune cell analysis in tumor-bearing mice (Hepa1-6 and Hep53.4).** Prior to gating, unstable acquisition periods and doublets were excluded. Cells were first selected based on FSC-A and SSC-A profiles. CD45⁺ cells were gated to identify CD3⁺ T cells, which were further subdivided into CD4⁺ (CD8⁻) and CD8⁺ subsets. CD8⁺ T cells were classified into Tpex cells (e.g., TCF-1⁺ PD-1⁺ Tim3⁻; CD62L⁺ PD-1⁺ Tim3⁻; IFN-γ⁺ TNF-α⁺; or GZMB⁺) and Tex cells (e.g., TCF-1⁻ PD-1⁺ Tim3⁺; CD62L⁻ PD-1⁺ Tim3⁺). CD45⁺ cells were also used to identify other immune populations, including dendritic cells (MHCII⁺ CD11c⁺ CD11b⁻), tumor-associated macrophages (F4/80⁺ CD11b⁺), and NK cells (NK1.1⁺). Gating thresholds were established using spleen samples from vehicle-treated control mice.

**
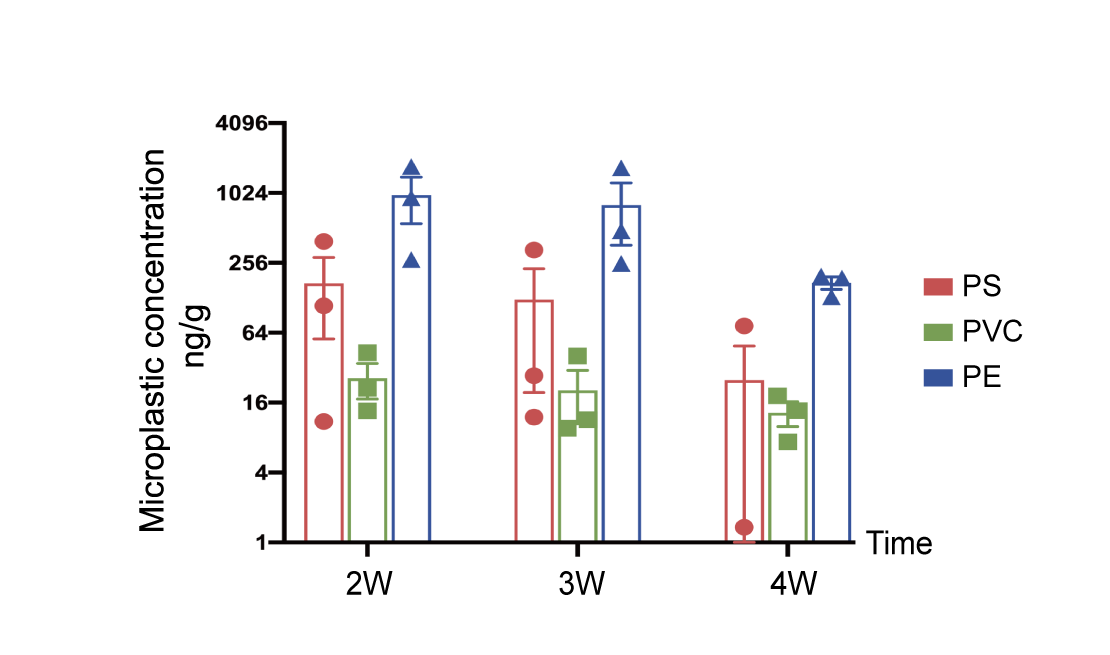
**

**Supplementary Fig. 2. Infiltration of MPs in the Hepa1-6 orthotopic HCC model.** Orthotopic Hepa1-6 tumor-bearing mice were treated with PS, PVC, or PE for 2 weeks. The levels of infiltrated MPs in tumors at weeks 2, 3, and 4 were quantified using PY-GCMS (n = 3). Data are presented as mean ± SD. MPs, microplastics; HCC, hepatocellular carcinoma, Py-GCMS, pyrolyzer-gas chromatography-mass spectrometry; PS, polystyrene; PE, polyethylene; PVC, polyvinyl chloride.

**
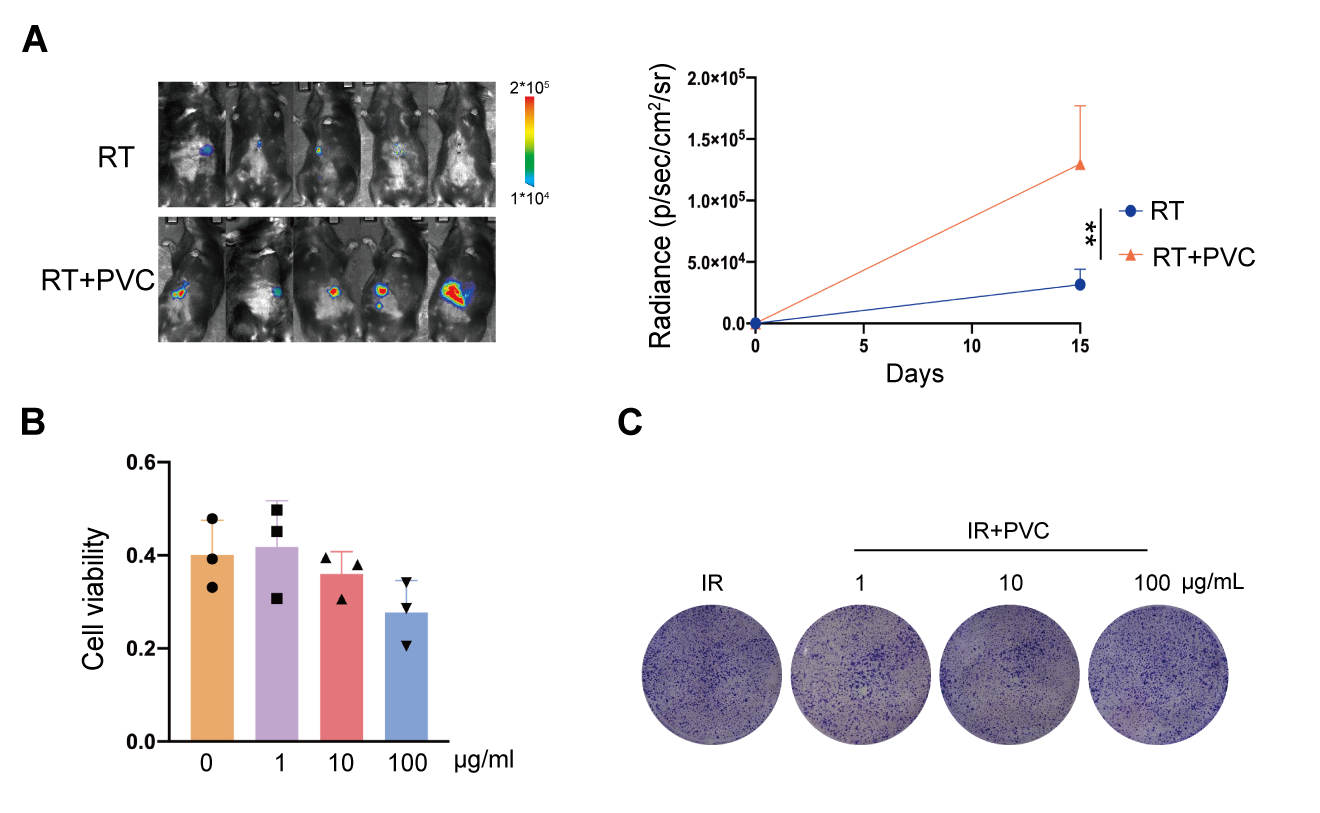
**

**Supplementary Fig 3. PVC impairs the efficacy of RT in hep53.4 orthotopic HCC model.** (A) Tumor growth curves of C57BL/6 mice bearing orthotopic hep53.4 tumors treated with IR or IR + PVC (n = 5). (B) Proliferation of hep53.4 cells co-cultured with PVC (n = 3). (C) Clonogenic survival assay of hep53.4 cells co-cultured with different concentrations of PVC and IR (2 Gy). Data are presented as mean ± SD (for B) or mean ± SEM (for A). Statistical comparisons were performed using an unpaired two-tailed Student’s t test (A) or one-way ANOVA followed by Tukey’s multiple comparison test (B,). Tumor volume data were analyzed using an m unpaired two-tailed Student’s t test. Significance levels are indicated as ***P* < 0.005. PVC, polyvinyl chloride; RT, radiation therapy; IR, ionizing radiation; HCC, hepatocellular carcinoma.

**
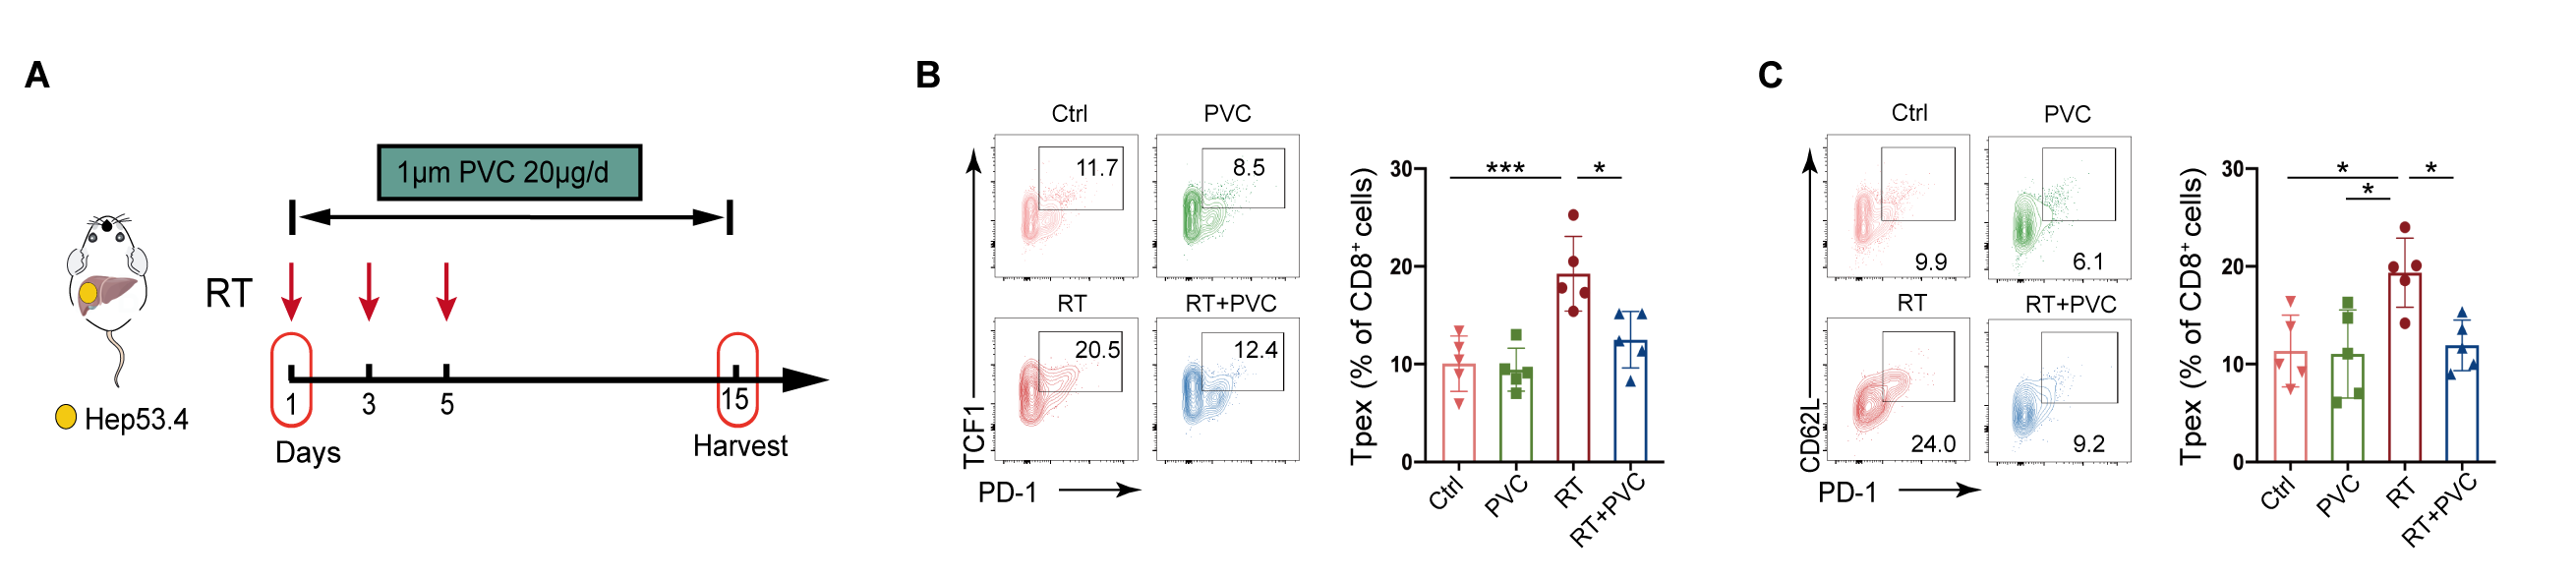
**

**Supplementary Fig 4. PVC inhibits RT-induced CD8⁺ T cell stem-like differentiation in the Hep53.4 orthotopic HCC model.** (A) Establishment of a Hep53.4-Luc orthotopic HCC model with PVC infiltration. (B-C) Flow cytometry analysis of Tpex (TCF1⁺ PD-1⁺ Tim-3⁻, CD62L⁺ PD-1⁺ Tim-3⁻) subsets among CD8⁺ T cells (n=5). Data are shown as mean ± SD. Statistical comparisons were conducted using one-way ANOVA with Tukey’s multiple comparison test. Significance is indicated as **P* < 0.05, ****P* < 0.0005. PVC, polyvinyl chloride; RT, radiation therapy; HCC, hepatocellular carcinoma; Tpex, precursor exhausted T cell; Tex, terminally exhausted T cell.


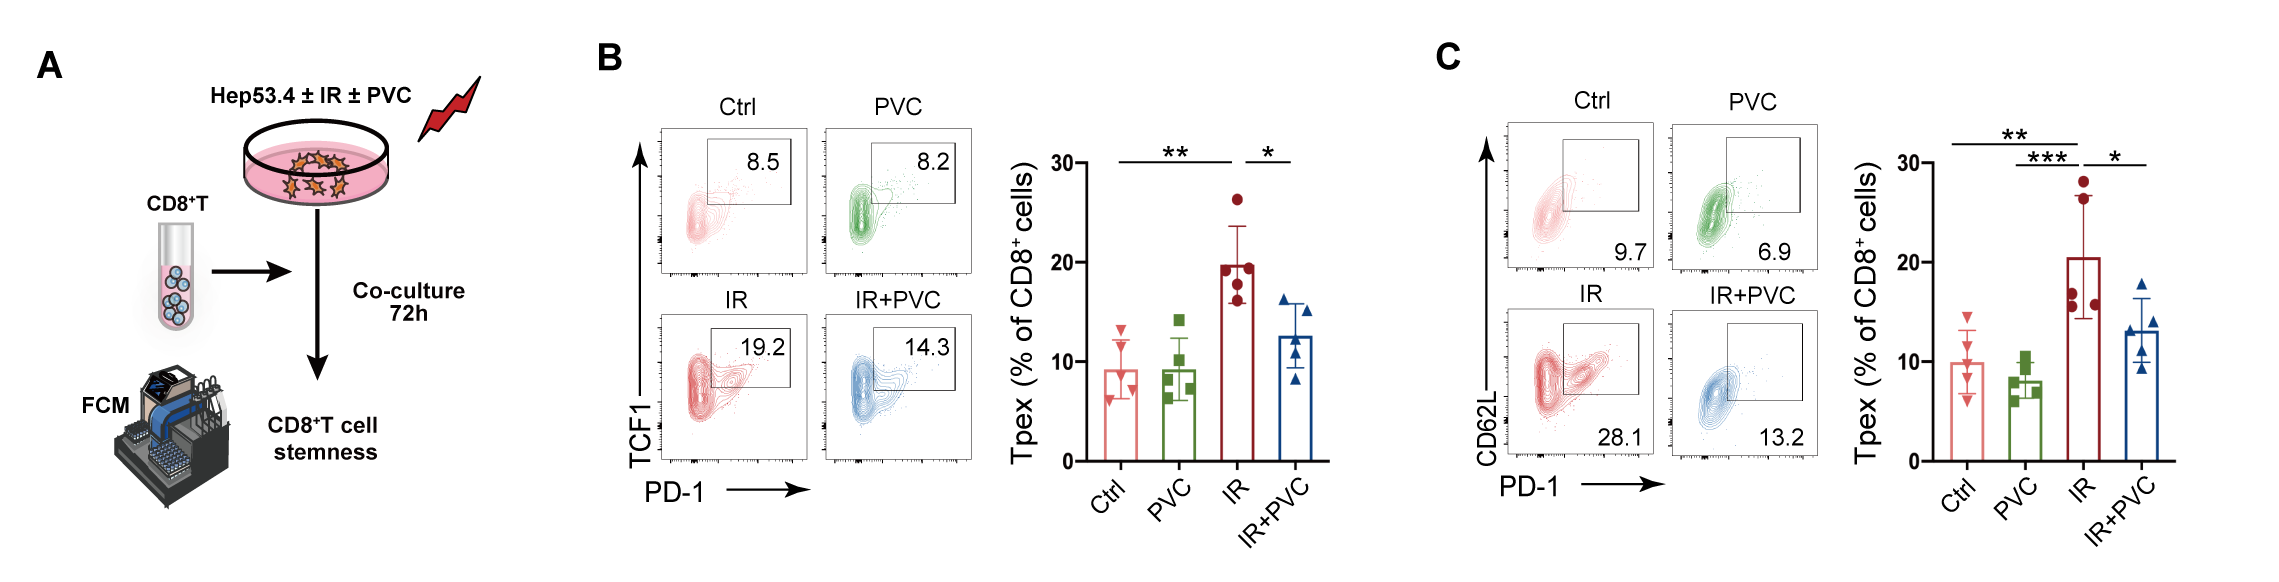


**Supplementary Fig 5. PVC inhibits CD8⁺ T cell stemness by modulating Hep53.4 cells.** (A) Schematic of the experimental procedure: Hep53.4 cells were treated with control, PVC, IR, or IR + PVC; culture supernatants were collected and co-cultured with naïve CD8⁺ T cells, followed by flow cytometry analysis of the Tpex subset proportion.(B-C) Flow cytometry analysis of Tpex subset proportions (TCF-1⁺ PD-1⁺ Tim3⁻, CD62L⁺ PD-1⁺ Tim3⁻) in CD8⁺ T cells co-cultured with supernatants from the differently treated Hep53.4 cells (n=5). Data are shown as mean ± SD. Statistical comparisons were conducted using one-way ANOVA with Tukey’s multiple comparison test. Significance is indicated as **P* < 0.05, ***P* < 0.005, ****P* < 0.0005. PVC, polyvinyl chloride; IR, ionizing radiation; Tpex, precursor exhausted T cell.


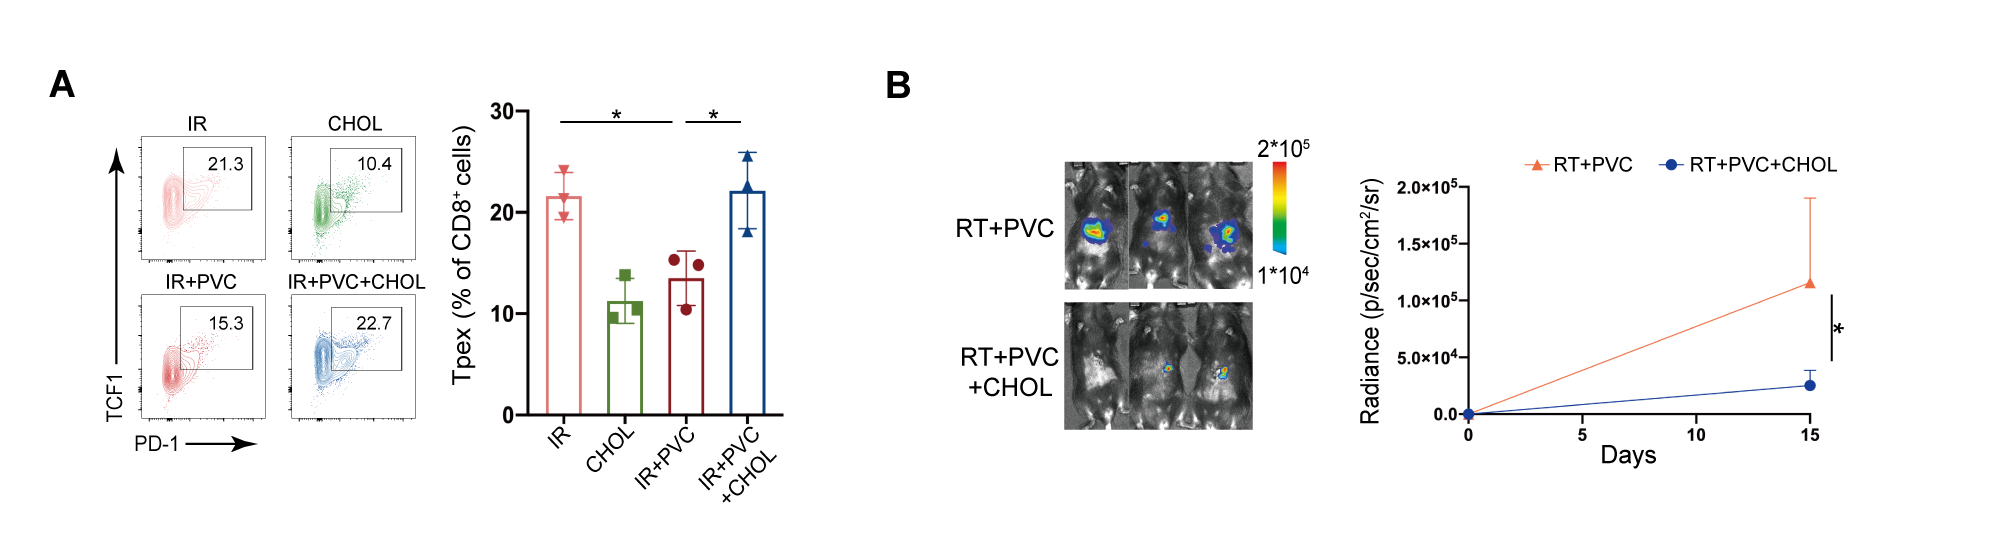


**Supplementary Fig 6. Cholesterol supplementation reverses the inhibitory effect of PVC on RT in the Hep53.4 orthotopic HCC model.** (A) Hep53.4 cells were treated with IR, cholesterol, IR + PVC, or IR + PVC + cholesterol; culture supernatants were collected and co-cultured with CD8⁺ T cells. Flow cytometry analysis of the Tpex subset proportion in CD8⁺ T cells was performed (n=5). (B) Hep53.4-luc orthotopic HCC model was established and treated with RT + PVC or RT + PVC + high-cholesterol diet. Tumor volume data were monitored using an in vivo imaging system (n=3). Data are presented as mean ± SD (for A) or mean ± SEM (for B). Statistical comparisons were performed using an unpaired two-tailed Student’s t test (B) or one-way ANOVA followed by Tukey’s multiple comparison test (A). Significance levels are indicated as **P* < 0.05. PVC, polyvinyl chloride; RT, radiation therapy; HCC, hepatocellular carcinoma; IR, ionizing radiation; Tpex, precursor exhausted T cell.

**Supplementary Table**

**Supplementary Table 1. CyTOF panel**

| **Marker** | **Clone** | **Label** | **Source** |
| --- | --- | --- | --- |
| CD45 | 30-F11 | 89Y | Biolegend |
| Ki-67 | SolA15 | 139La | eBioscience |
| MHC II(I-A/I-E) | M5/114.15.2 | 141Pr | Biolegend |
| CD11c | N418 | 142Nd | Biolegend |
| CD69 | H1.2F3 | 143Nd | Biolegend |
| CX3CR1 | SA011F11 | 144Nd | Biolegend |
| CD152(CTLA-4) | UC10-4B9 | 145Nd | Biolegend |
| CD28 | 37.51 | 146Nd | Biolegend |
| CD80 | 16-10A1 | 147Sm | Biolegend |
| Ly-6C | HK1.4 | 148Nd | Biolegend |
| CD172a(SIRPα) | P84 | 149Sm | Biolegend |
| CD186(CXCR6) | SA051D1 | 150Nd | Biolegend |
| CD45R(B220) | RA3-6B2 | 151Eu | Biolegend |
| CD19 | 6D5 | 152Sm | Biolegend |
| CD44 | IM7 | 153Eu | Biolegend |
| TIGIT(VSTM3) | 2190A | 154Sm | RD |
| CD127(IL-7Rα) | A7R34 | 155Gd | Biolegend |
| CD62L | MEL-14 | 156Gd | Biolegend |
| CD83 | Michel-19 | 157Gd | Biolegend |
| TCR γ/δ | GL3 | 158Gd | Biolegend |
| F4/80 | Cl: A3-1 | 159Tb | Biorad |
| CD206(MMR) | C068C2 | 160Gd | Biolegend |
| CD279(PD-1) | 29F.1A12 | 161Dy | Biolegend |
| CD103(Integrin αE) | 2E7 | 162Dy | Biolegend |
| CD25(IL-2Rα) | 3C7 | 163Dy | Biolegend |
| CD197(CCR7) | 4B12 | 164Dy | Biolegend |
| TCF7(TCF1) | 812145 | 165Ho | RD |
| Ly-6G | 1A8 | 166Er | Biolegend |
| CD49b(pan-NK cells) | DX5 | 167Er | Biolegend |
| CD185(CXCR5) | L138D7 | 168Er | Biolegend |
| TCR β chain | H57-597 | 169Tm | Biolegend |
| CD161(NK-1.1) | PK136 | 170Er | Biolegend |
| CD86 | GL-1 | 171Yb | Biolegend |
| CD192(CCR2) | 475301 | 172Yb | RD |
| CD366(Tim-3) | RMT3-23 | 173Yb | Biolegend |
| CD223(LAG-3) | C9B7W | 174Yb | Biolegend |
| IFN-γ | XMG1.2 | 175Lu | Bioxcell |
| TNF-α | MP6-XT22 | 176Yb | Biolegend |
| CD3ε | 145-2C11 | 195Pt | Biolegend |
| CD4 | RM4-5 | 197Au | Biolegend |
| CD8a | 53-6.7 | 198Pt | Biolegend |
| CD11b | M1/70 | 209Bi | Biolegend |
